# Supplementary material
Source: publisher figshare collection journal article supplement (https://frontiersin.figshare.com/ndownloader/files/21931965)
Supplement: Supplementary file 1 [file 21931965]

Model selection of fixed effects for the stem CH4 linear mixed effect model

The symbol * indicates that interactions between environmental variables are being tested, as well as the environmental variables being tested individually.

1) Original model.

Stem CH4 model 1<-lme(CH4~Mean monthly relative humidity*Plantation*Palm

+Plantation*Palm*WTD*Soil moisture

+Plantation*Palm*Soil temperature

+Mean monthly relative humidity*Soil moisture

+Mean monthly relative humidity*WTD

+Mean monthly relative humidity*Soil temperature

+Air temperature*Plantation*Palm

+Mean monthly relative humidity*Air temperature,

random=~1|Plantation/Palm)

2) The interaction between monthly mean relative humidity and soil moisture was dropped.

Stem CH4 model 2<-lme(CH4~Mean monthly relative humidity*Plantation*Palm

+Plantation*Palm*WTD*Soil moisture

+Plantation*Palm*Soil temperature

+Mean monthly relative humidity*WTD

+Mean monthly relative humidity*Soil temperature

+Air temperature*Plantation*Palm

+Mean monthly relative humidity*Air temperature,

random=~1|Plantation/Palm)

3) The interaction between air temperature, plantation and palm was dropped.

Stem CH4 model 3<-lme(CH4~Mean monthly relative humidity*Plantation*Palm

+Plantation*Palm*WTD*Soil moisture

+Plantation*Palm*Soil temperature

+Mean monthly relative humidity*WTD

+Mean monthly relative humidity*Soil temperature

+Air temperature*Palm

+Air temperature*Plantation

+Mean monthly relative humidity*Air temperature,

random=~1|Plantation/Palm)

4) The interaction between monthly relative humidity and air temperature was dropped.

Stem CH4 model 4<-lme(CH4~Mean monthly relative humidity*Plantation*Palm

+Plantation*Palm*WTD*Soil moisture

+Plantation*Palm*Soil temperature

+Mean monthly relative humidity*WTD

+Mean monthly relative humidity*Soil temperature

+Air temperature*Palm

+Air temperature*Plantation,

random=~1|Plantation/Palm)

5) The interaction between air temperature and palm was dropped.

Stem CH4 model 5<-lme(CH4~Mean monthly relative humidity*Plantation*Palm

+Plantation*Palm*WTD*Soil moisture

+Plantation*Palm*Soil temperature

+Mean monthly relative humidity*WTD

+Mean monthly relative humidity*Soil temperature

+Air temperature*Plantation,

random=~1|Plantation/Palm)

6) The interaction between plantation, palm and soil temperature was dropped.

Stem CH4 model 6<-lme(CH4~Mean monthly relative humidity*Plantation*Palm

+Plantation*Palm*WTD*Soil moisture

+Plantation*Soil temperature

+Palm*Soil temperature

+Mean monthly relative humidity*WTD

+Mean monthly relative humidity*Soil temperature

+Air temperature*Plantation,

random=~1|Plantation/Palm)

7) The interaction between plantation, palm and soil temperature was dropped.

Stem CH4 model 7<-lme(CH4~Mean monthly relative humidity*Plantation*Palm

+Palm*WTD*Soil moisture

+Plantation*WTD*Soil moisture

+Plantation*Palm*Soil moisture

+Plantation*Palm*WTD

+Plantation*Soil temperature

+Palm*Soil temperature

+Mean monthly relative humidity*WTD

+Mean monthly relative humidity*Soil temperature

+Air temperature*Plantation,

random=~1|Plantation/Palm)

8) The interaction between plantation, palm and WTD was dropped.

Stem CH4 model 8<-lme(CH4~Mean monthly relative humidity*Plantation*Palm

+Palm*WTD*Soil moisture

+Plantation*WTD*Soil moisture

+Plantation*Palm*Soil moisture

+Plantation*Soil temperature

+Palm*Soil temperature

+Mean monthly relative humidity*WTD

+Mean monthly relative humidity*Soil temperature

+Air temperature*Plantation,

random=~1|Plantation/Palm)

9) The interaction between palm, WTD and soil moisture was dropped.

Stem CH4 model 9<-lme(CH4~Mean monthly relative humidity*Plantation*Palm

+Palm*WTD

+Plantation*WTD*Soil moisture

+Plantation*Palm*Soil moisture

+Plantation*Soil temperature

+Palm*Soil temperature

+Mean monthly relative humidity*WTD

+Mean monthly relative humidity*Soil temperature

+Air temperature*Plantation,

random=~1|Plantation/Palm)

10) The interaction between plantation, WTD and soil moisture was dropped.

Stem CH4 model 10<-lme(CH4~Mean monthly relative humidity*Plantation*Palm

+Palm*WTD

+WTD*Soil moisture

+Plantation*WTD

+Plantation*Palm*Soil moisture

+Plantation*Soil temperature

+Palm*Soil temperature

+Mean monthly relative humidity*WTD

+Mean monthly relative humidity*Soil temperature

+Air temperature*Plantation,

random=~1|Plantation/Palm)

11) The interaction between WTD and soil moisture was dropped.

Stem CH4 model 11<-lme(CH4~Mean monthly relative humidity*Plantation*Palm

+Palm*WTD

+Plantation*WTD

+Plantation*Palm*Soil moisture

+Plantation*Soil temperature

+Palm*Soil temperature

+Mean monthly relative humidity*WTD

+Mean monthly relative humidity*Soil temperature

+Air temperature*Plantation,

random=~1|Plantation/Palm)

12) The interaction between plantation and WTD was dropped.

Stem CH4 model 12<-lme(CH4~Mean monthly relative humidity*Plantation*Palm

+Palm*WTD

+Plantation*Palm*Soil moisture

+Plantation*Soil temperature

+Palm*Soil temperature

+Mean monthly relative humidity*WTD

+Mean monthly relative humidity*Soil temperature

+Air temperature*Plantation,

random=~1|Plantation/Palm)

13) The interaction between monthly relative humidity and WTD was dropped.

Stem CH4 model 13<-lme(CH4~Mean monthly relative humidity*Plantation*Palm

+Palm*WTD

+Plantation*Palm*Soil moisture

+Plantation*Soil temperature

+Palm*Soil temperature

+Mean monthly relative humidity*Soil temperature

+Air temperature*Plantation,

random=~1|Plantation/Palm)

14) The interaction between plantation and soil temperature was dropped.

Stem CH4 model 14<-lme(CH4~Mean monthly relative humidity*Plantation*Palm

+Palm*WTD

+Plantation*Palm*Soil moisture

+Palm*Soil temperature

+Mean monthly relative humidity*Soil temperature

+Air temperature*Plantation,

random=~1|Plantation/Palm)

15) The interaction between palm and WTD was dropped.

Stem CH4 model 15<-lme(CH4~Mean monthly relative humidity*Plantation*Palm

+WTD

+Plantation*Palm*Soil moisture

+Palm*Soil temperature

+Mean monthly relative humidity*Soil temperature

+Air temperature*Plantation,

random=~1|Plantation/Palm)

16) The interaction between palm and soil temperature was dropped.

Stem CH4 model 16<-lme(CH4~Mean monthly relative humidity*Plantation*Palm

+WTD

+Plantation*Palm*Soil moisture

+Mean monthly relative humidity*Soil temperature

+Air temperature*Plantation,

random=~1|Plantation/Palm)
